# Supplementary material for: Viologen-based Ln-MOF material with photochromicity and photoluminescence for anticounterfeiting
Source: Royal Society of Chemistry journal article supplement (doi:10.1039/d4ce00652f), 2024-01-01
Supplement: d4ce00652f1.pdf [file d4ce00652f1.pdf]

## Supplementary Information

### Viologen-Based Ln-MOFs Material with Photochromic and Photoluminescence for Anticounterfeiting

Wen-Bo Cui, Li Huang, Yuan Shen, Xiao-Yang Yu, Zi-Yi Li and Hong Zhang\*

Key Laboratory of Polyoxometalate Science of Ministry of Education, Department of  
Chemistry, Northeast Normal University, Changchun, Jilin 130024, P.R. China

\*Corresponding author.

E-mail address: [zhangh@nenu.edu.cn](mailto:zhangh@nenu.edu.cn); [hope20130122@163.com](mailto:hope20130122@163.com)

Table S1 Crystallographic data for **1** and **2**

| Empirical formula                         | C <sub>40</sub> H <sub>28</sub> ClEu <sub>2</sub> N <sub>4</sub> O <sub>23</sub> | C <sub>40</sub> H <sub>30</sub> ClN <sub>4</sub> O <sub>24</sub> Tb <sub>2</sub> |
|-------------------------------------------|----------------------------------------------------------------------------------|----------------------------------------------------------------------------------|
| Formula weight                            | 1272.03                                                                          | 1303.97                                                                          |
| Temperature/K                             | 298.15                                                                           | 298.15                                                                           |
| Crystal system                            | monoclinic                                                                       | monoclinic                                                                       |
| Space group                               | <i>C2/c</i>                                                                      | <i>C2/c</i>                                                                      |
| <i>a</i> /Å                               | 36.492(3)                                                                        | 36.461(3)                                                                        |
| <i>b</i> /Å                               | 12.6245(10)                                                                      | 12.5228(9)                                                                       |
| <i>c</i> /Å                               | 20.7562(16)                                                                      | 20.6904(14)                                                                      |
| $\alpha$ /°                               | 90                                                                               | 90                                                                               |
| $\beta$ /°                                | 101.443(3)                                                                       | 101.468(3)                                                                       |
| $\gamma$ /°                               | 90                                                                               | 90                                                                               |
| Volume/Å <sup>3</sup>                     | 9372.2(12)                                                                       | 9258.5(12)                                                                       |
| <i>Z</i>                                  | 8                                                                                | 8                                                                                |
| $\rho_{\text{calc}}$ /cm <sup>3</sup>     | 1.803                                                                            | 1.871                                                                            |
| $\mu$ /mm <sup>-1</sup>                   | 2.798                                                                            | 3.181                                                                            |
| F(000)                                    | 4984                                                                             | 5096                                                                             |
| Radiation                                 | Mo- <i>K</i> $\alpha$ ( $\lambda$ =<br>0.71073)                                  | Mo- <i>K</i> $\alpha$ ( $\lambda$ =<br>0.71073)                                  |
| 2 $\theta$ range for data<br>collection/° | 4.836 to 50.128                                                                  | 4.72 to 50.228                                                                   |
| Reflections collected                     | 47815                                                                            | 39508                                                                            |
| Independent reflections                   | 8256 [R <sub>int</sub> =<br>0.0476, R <sub>sigma</sub> =<br>0.0307]              | 8184 [R <sub>int</sub> =<br>0.1685, R <sub>sigma</sub> =<br>0.0978]              |
| Data/restraints/parameters                | 8256/240/632                                                                     | 8184/0/649                                                                       |
| Goodness-of-fit on F <sup>2</sup>         | 1.073                                                                            | 1.048                                                                            |
| Final R indexes<br>[I >= 2 $\sigma$ (I)]  | R <sub>1</sub> = 0.0449<br>wR <sub>2</sub> = 0.1295                              | R <sub>1</sub> = 0.0584<br>wR <sub>2</sub> = 0.1490                              |
| Final R indexes [all data]                | R <sub>1</sub> = 0.0529<br>wR <sub>2</sub> = 0.1353                              | R <sub>1</sub> = 0.0795<br>wR <sub>2</sub> = 0.1613                              |

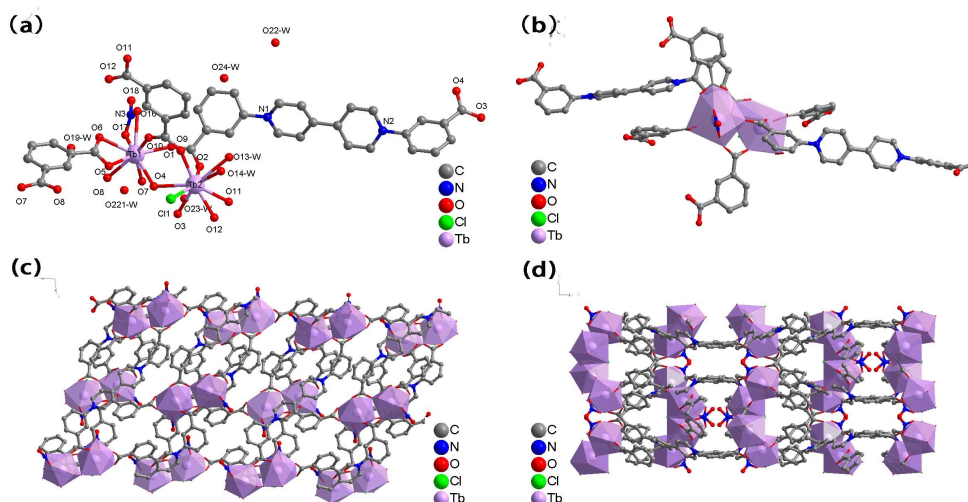

Figure S1. (a) Metal coordination environments of compound 2. (b) Metal coordination environments of compound 2. (c-d) 3D network stacking structure of 2 in the *b,c* direction.

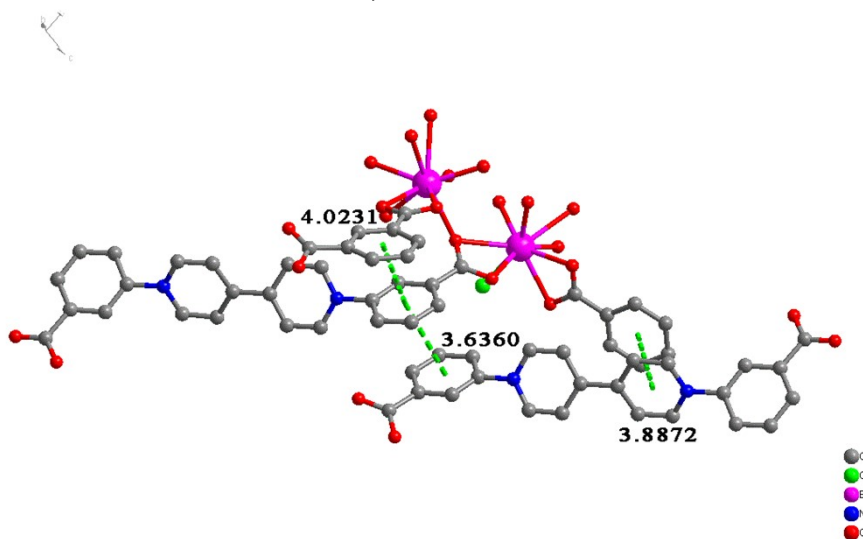

Figure S2. Structures of compound 1 by  $\pi \cdots \pi$  interactions.

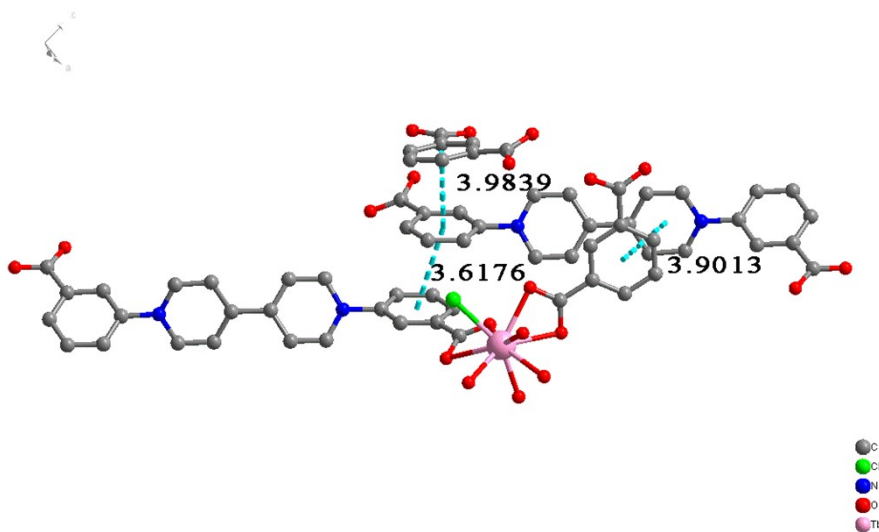

Figure S3. Structures of compound 2 by  $\pi \cdots \pi$  interactions.

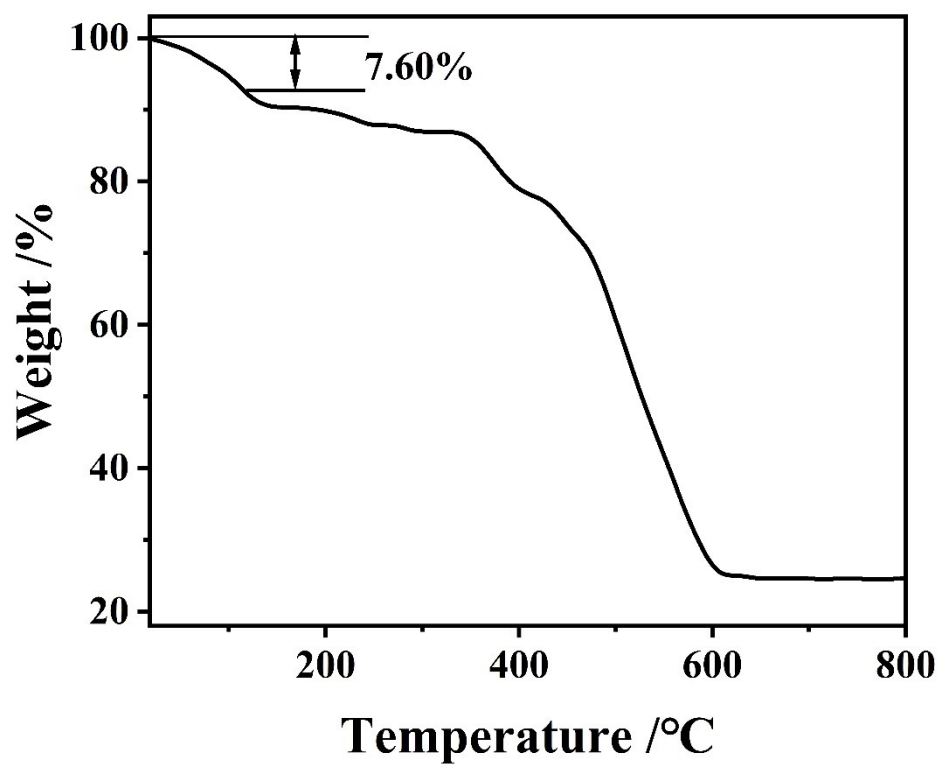

Figure S4. The TG plot for 1.

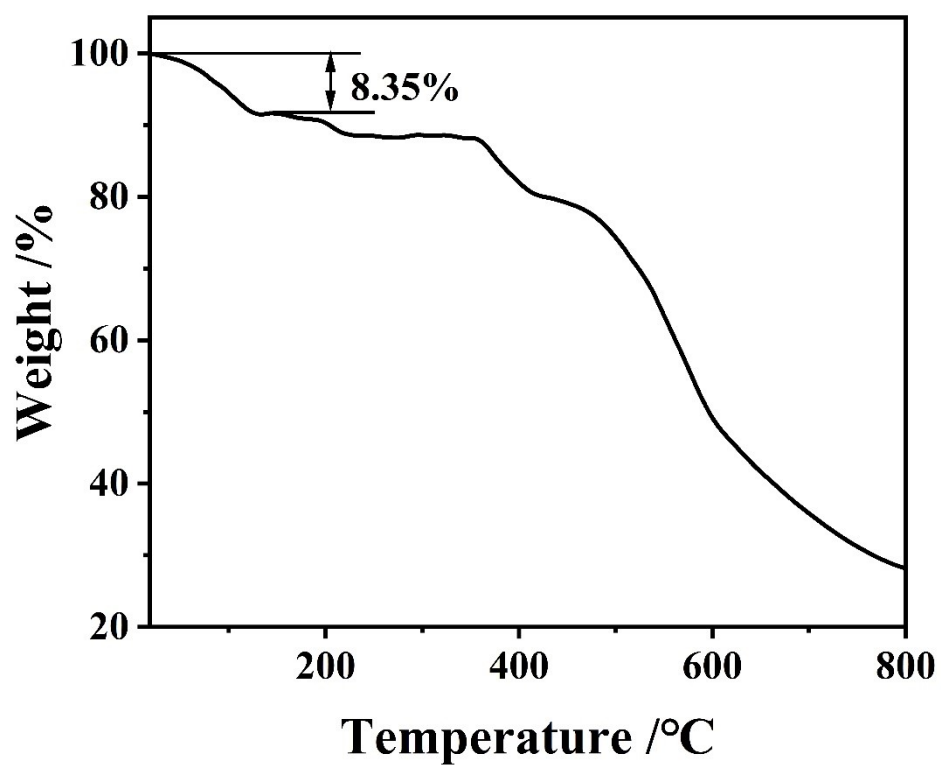

Figure S5. The TG plot for 2.

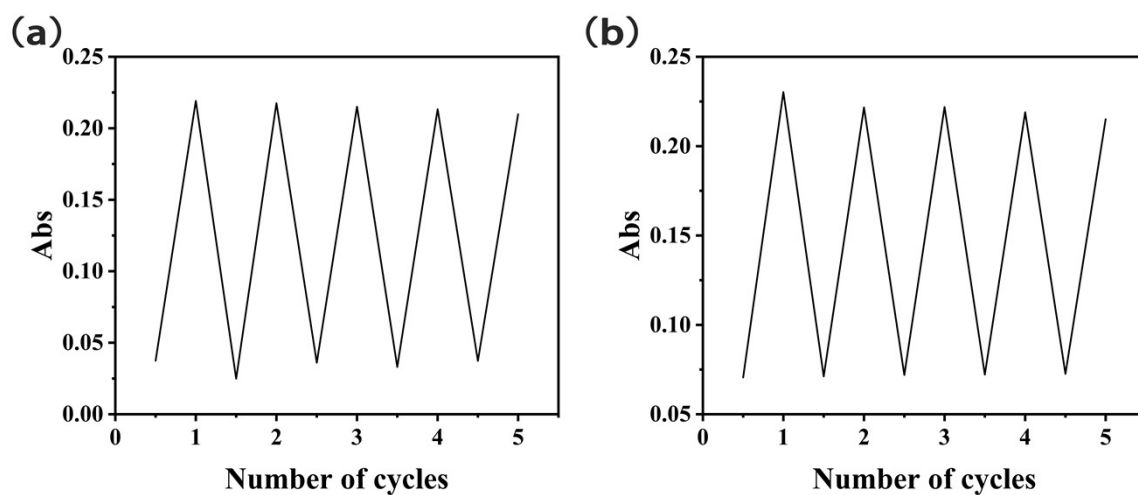

Figure S6. Stability of compounds 1 and 2

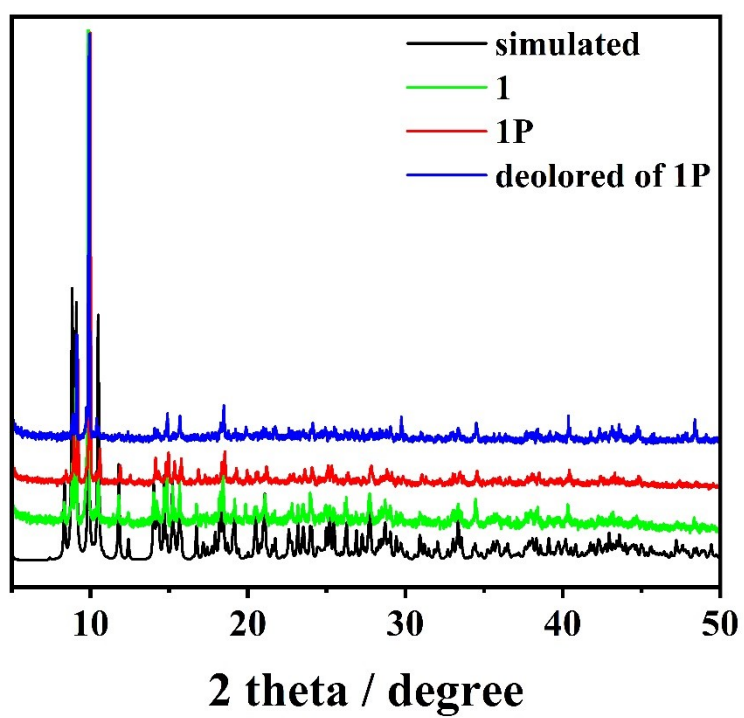

Figure S7. PXRD of simulated, 1, 1P, decolored of 1P.

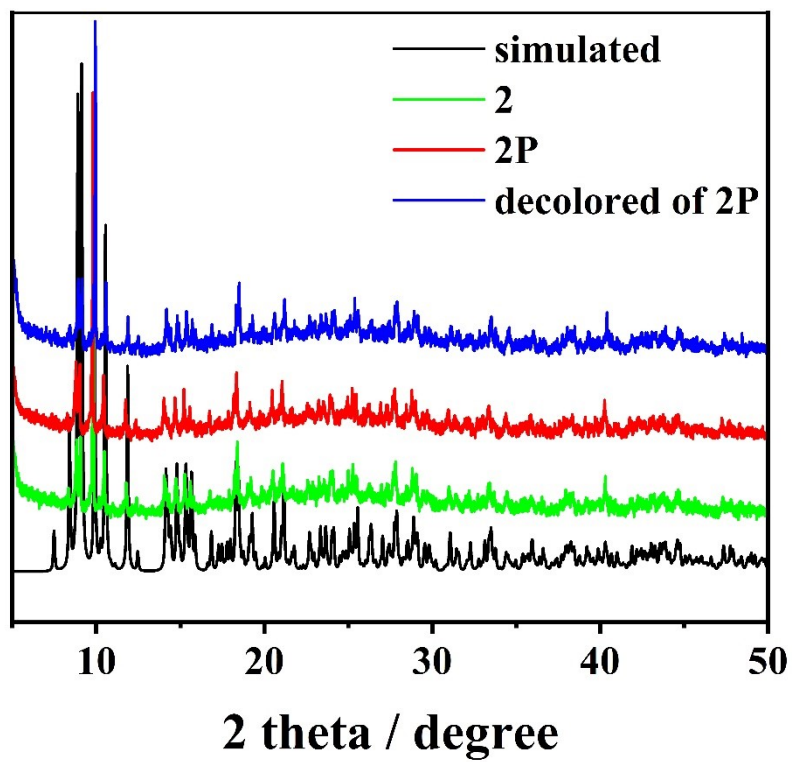

Figure S8. PXRD of simulated, 2, 2P, decolored of 2P.

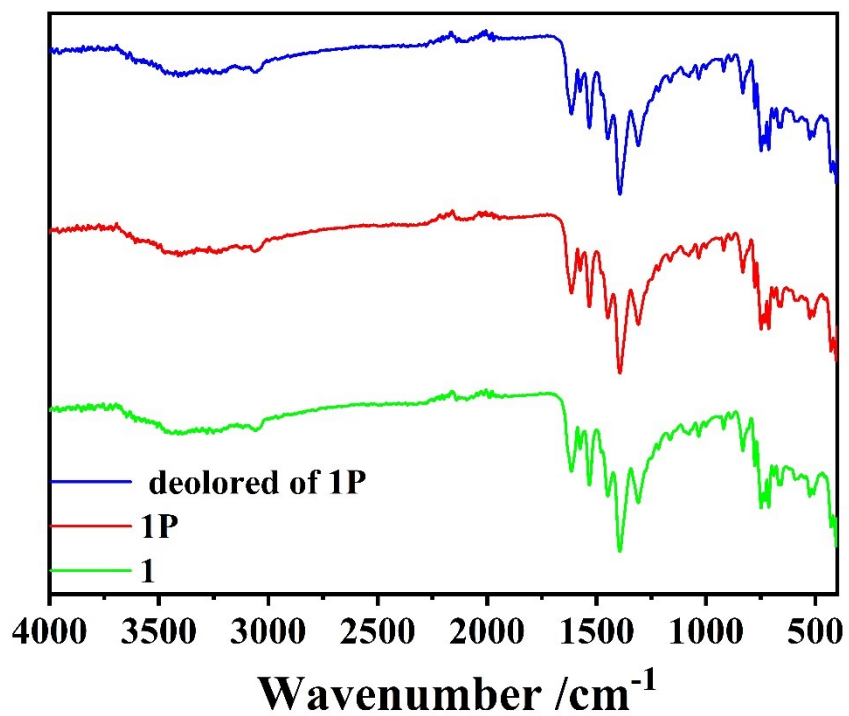

Figure S9. FT-IR spectra of 1, 1P, decolored of 1P.

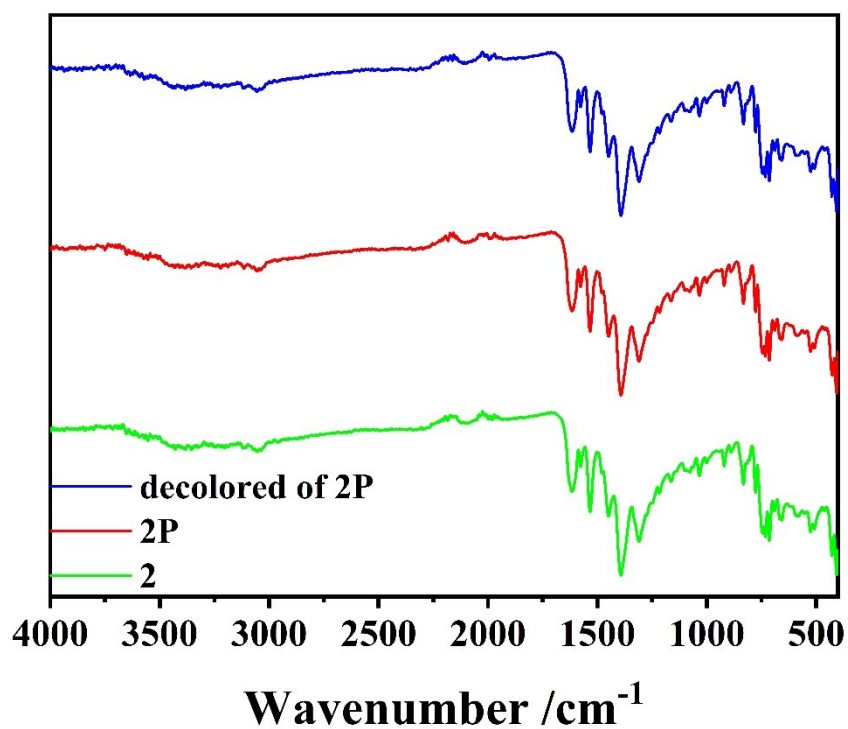

Figure S10. FT-IR spectra of 2, 2P, decolored of 2P.

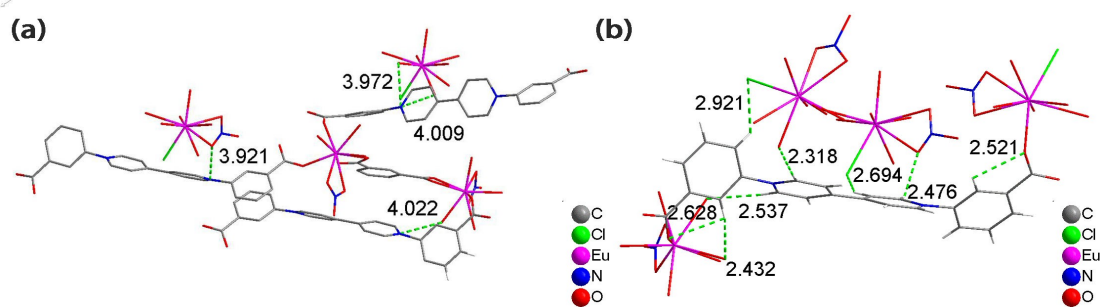

Figure S11. Electron transfer path of compound 1 : (a) N-O; (b)  $\alpha/\beta$  C-H...O/Cl.

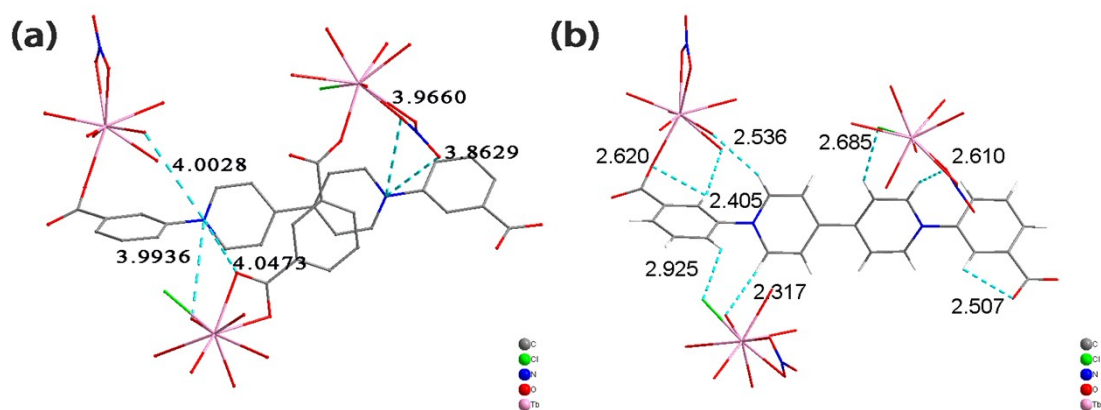

Figure S12. Electron transfer path of compound 2 : (a) N-O; (b)  $\alpha/\beta$  C-H...O/Cl.

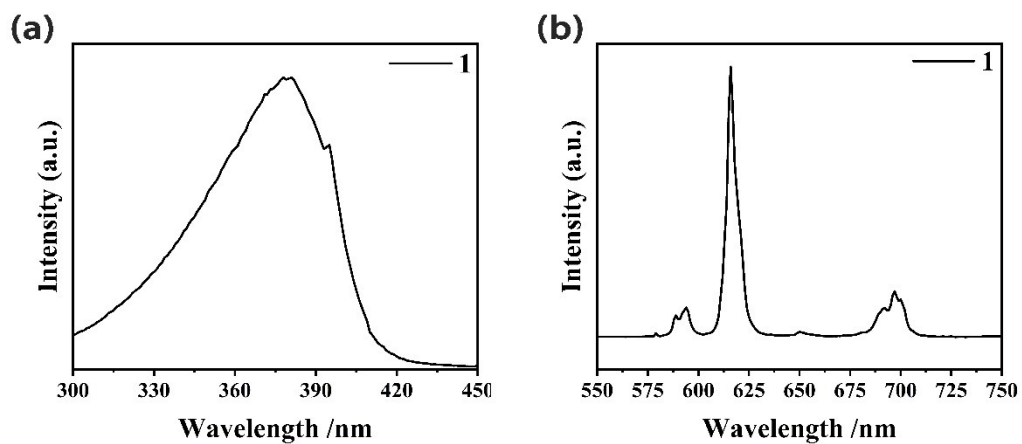

Figure S13. The solid-state excitation spectra (a) and emission spectra (b) of **1** at room temperature ( $\lambda_{\text{ex}} = 380$  nm)

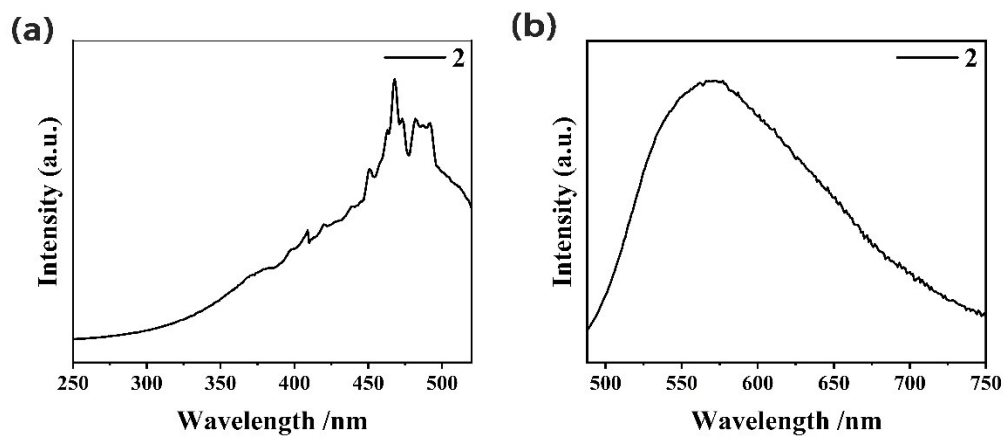

Figure S14. The solid-state excitation spectra (a) and emission spectra (b) of **2** at room temperature ( $\lambda_{\text{ex}} = 468$  nm)

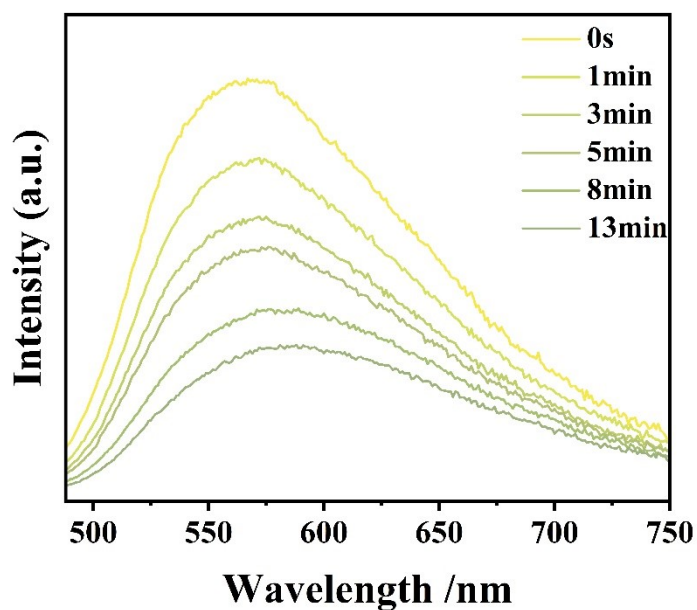

Figure S15. Photomodulated fluorescence spectra of **2**.
